# Supplementary material for: Three-dimensional structure of basal body triplet revealed by electron cryo-tomography
Source: PubMed Central journal article supplement — EMBO J. 2011 Dec 13;31(3):552–62. doi: 10.1038/emboj.2011.460 (PMC3273388; doi:10.1038/emboj.2011.460), 2011-12-13

## Supplemental material

The supplemental material includes two figures.

### Figure legends for the supplemental figures

**Figure S1.** Assessing the resolution of the averaged MT triplet by the Fourier shell correlation (FSC) Method. Two criteria are used as indicated. At FSC=0.5 in green dashed line, the resolution is 38 Å and at FSC=0.143 in blue dashed line, the resolution is 33 Å.

**Figure S2.** Longitudinal cross-section views of the averaged triplet structure from different orientations. The protofilaments are labeled. Tubulin monomer can be resolved along most protofilaments in the triplet. The characteristic 4 nm spacing for tubulin monomer along protofilaments are indicated with yellow dots. Scale bars are 10 nm.

# Figure S1

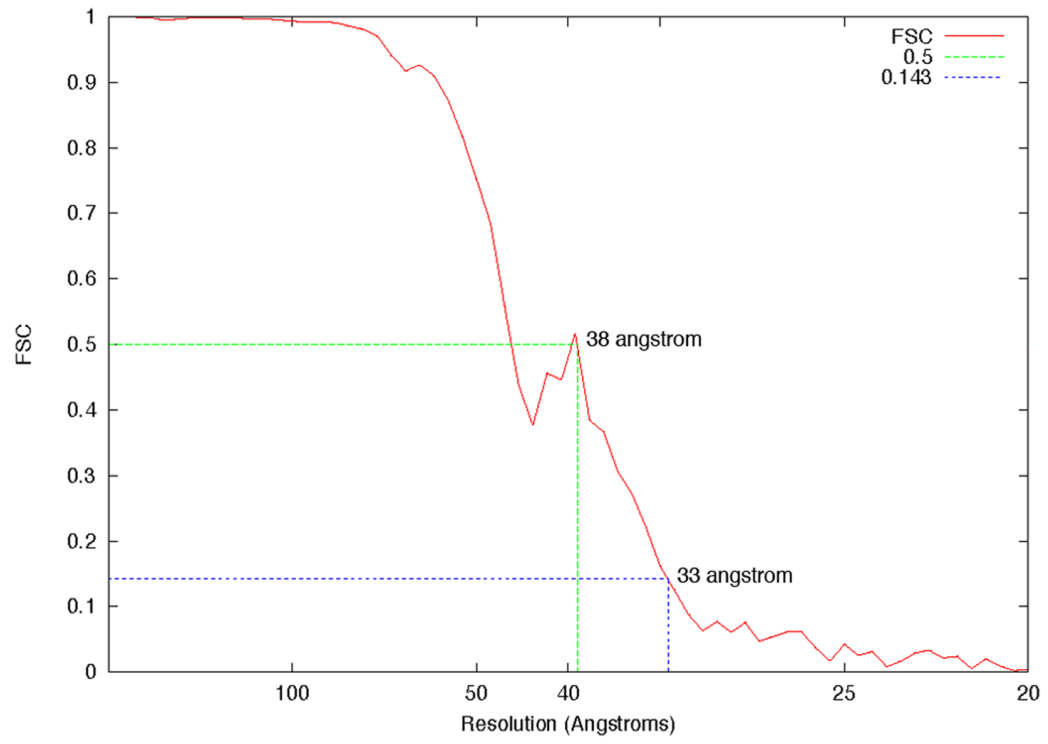

**Figure S2**

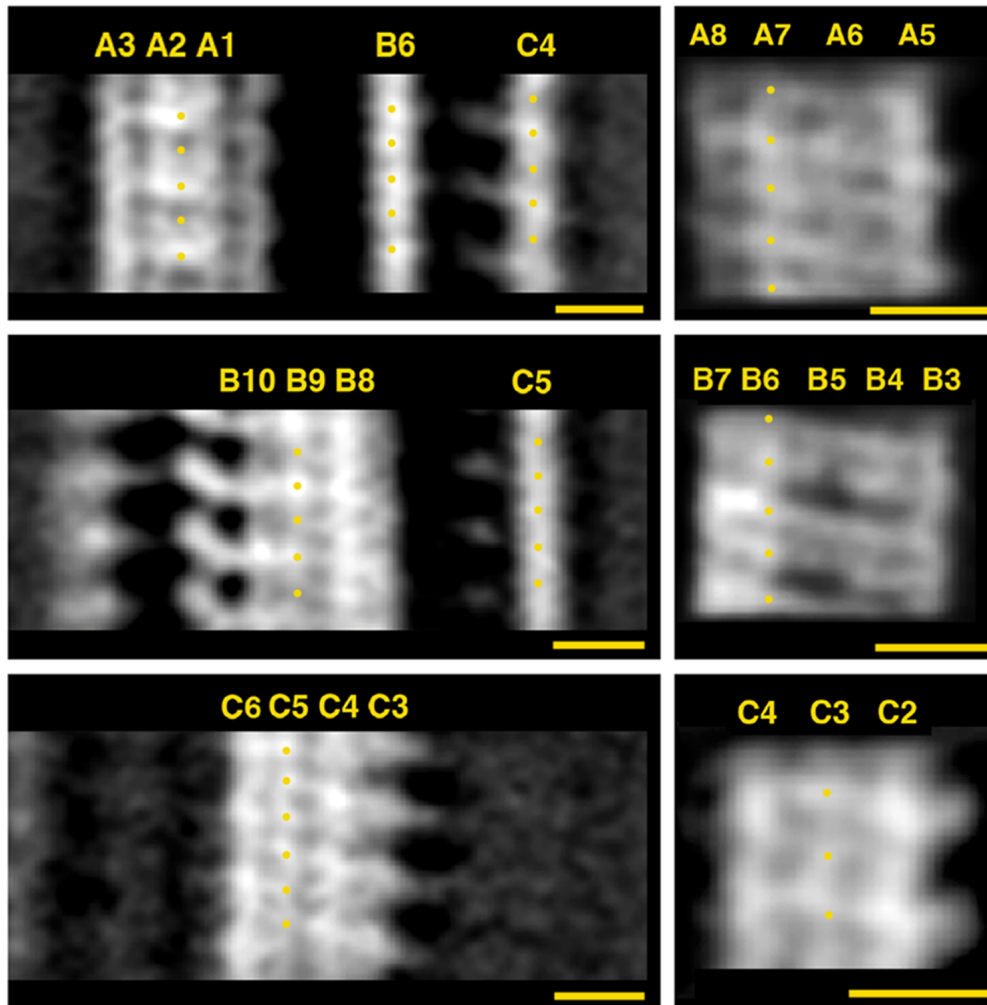

Supplement: emboj2011460s1.pdf [file emboj2011460s1.pdf]
